# Supplementary material
Source: PubMed Central journal article supplement (PMC4375078)
Supplement: supp_db14-1020_DB141020SupplementaryData1.pdf [file supp_db14-1020_DB141020SupplementaryData1.pdf]

SUPPLEMENTARY DATA

**Supplementary Figure 1. Overview of human islet-engrafted mouse studies.** (A) Summary of three experiments. (B) Survival of mice in each of the three experiments. Experiment 1: n = 5, mock-infected, n = 7, CVB4-infected. One infected, non-diabetic mouse required euthanasia at 21 dpi. Experiment 2: n = 7, mock-infected, n = 7, CVB4-infected. Three infected mice required euthanasia between 23 and 27 dpi due to severe fight wounds. Experiment 3: n = 5, mock-infected, n = 9, CVB4-infected. Four mice died prematurely between 15-35 dpi. (C) Average weight loss of mice in each of the three experiments. Body weight is expressed as the percent difference from the body weight of baseline. Experiment 1: n = 5, mock-infected, n = 7, CVB4-infected. Experiment 2: n = 7, mock-infected, n = 7, CVB4-infected. Experiment 3: n = 5, mock-infected, n = 9, CVB4-infected. For Experiment 1, only mice that survived beyond 21 dpi were included for further analysis. For Experiments 2 and 3, only mice that survived beyond 35 dpi were included for further analysis.

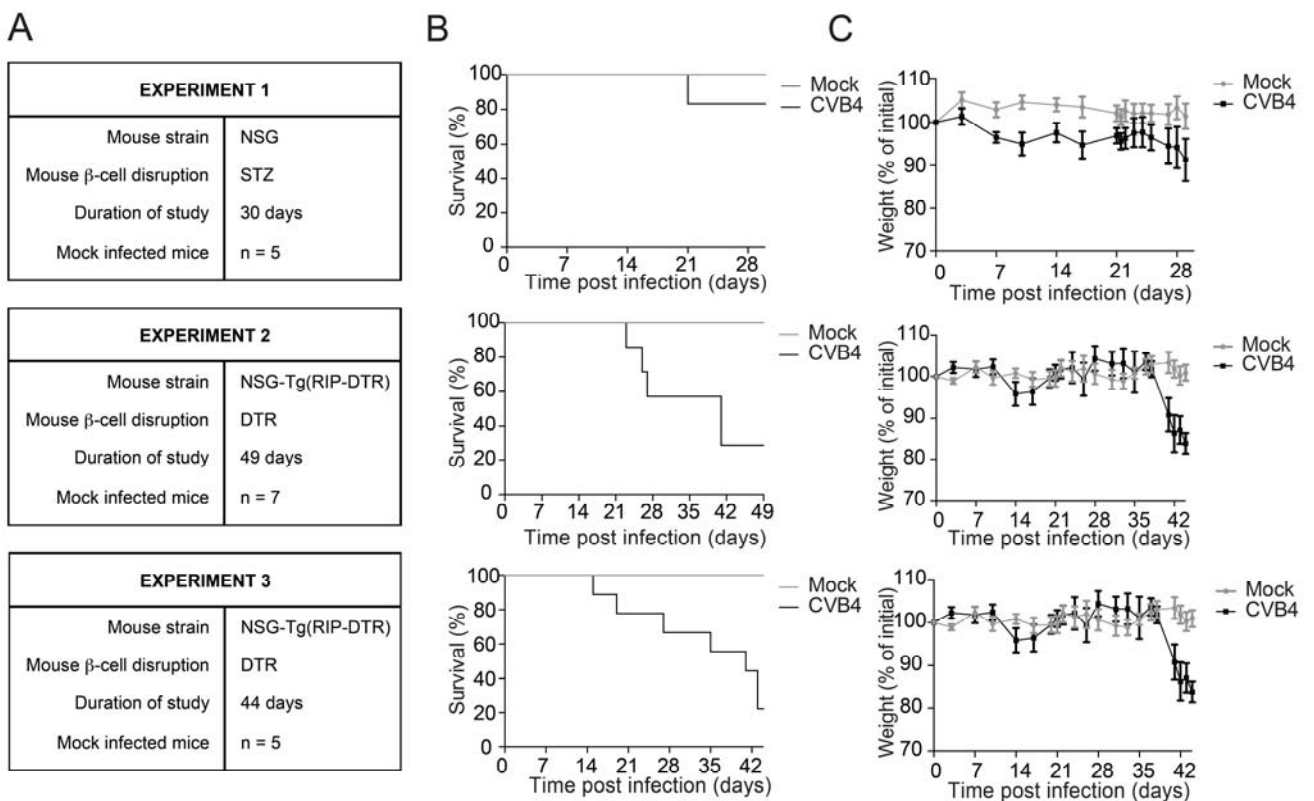

SUPPLEMENTARY DATA

**Supplementary Figure 2. Histology of human islet grafts from CVB4-infected mice, including a normoglycemic mouse and one that ultimately became diabetic.** Histological sections from mice in Experiment 3 are shown here. H&E staining is shown at either 40x magnification (top row) or 200x magnification (second row). Immunohistochemical staining for either insulin (third row) or glucagon (bottom row) are also shown at 100x magnification. Findings in this experiment were similar to those described for Experiment 2 in Figure 2.

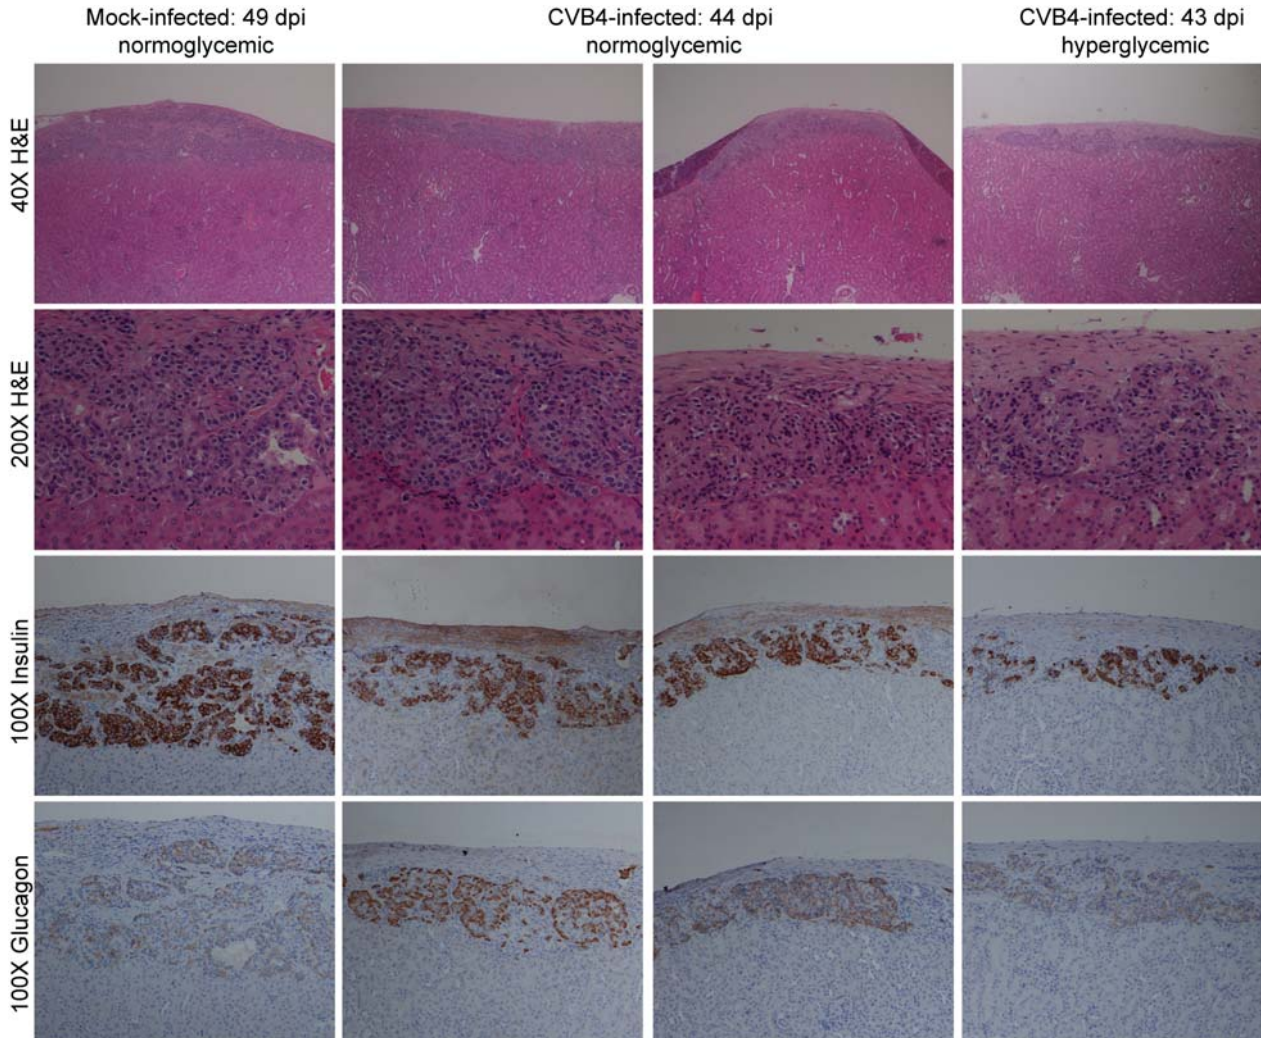

## SUPPLEMENTARY DATA

**Supplementary Figure 3. EGFP-CVB3 infects beta cells of cultured human islets.** Dispersed human islets were infected with EGFP-CVB3 ( $1 \times 10^6$  PFU/100 IEQ). A subset of the virally infected cells is insulin positive by immunofluorescent staining (arrowheads). EGFP-CVB3 is green, insulin is red, DAPI is blue. Co-localization of CVB3 and insulin is yellow. Scale bar represents 75  $\mu\text{m}$ .

Cultured islets were treated with TrypLE (Life Technologies) diluted 1:3 in PBS for 5 min at 37°C. Islet culture medium was added to stop the reaction, and cells were pelleted, resuspended in fresh medium, then allowed to attach to coverslips. Cells were cultured in the presence of virus or media control for 16 h, after which cells were washed, fixed with 3.7% paraformaldehyde, then permeabilized and blocked. Guinea pig antibody to insulin was added, followed by Alexa Fluor-594 goat antibody to guinea pig IgG. Coverslips were mounted with ProLong Gold Antifade Reagent with DAPI. Confocal images were acquired using a Leica TCS SP8 DNI6000 confocal microscope using Leica image acquisition software LAS AF Version 3.1.0 build 8578.

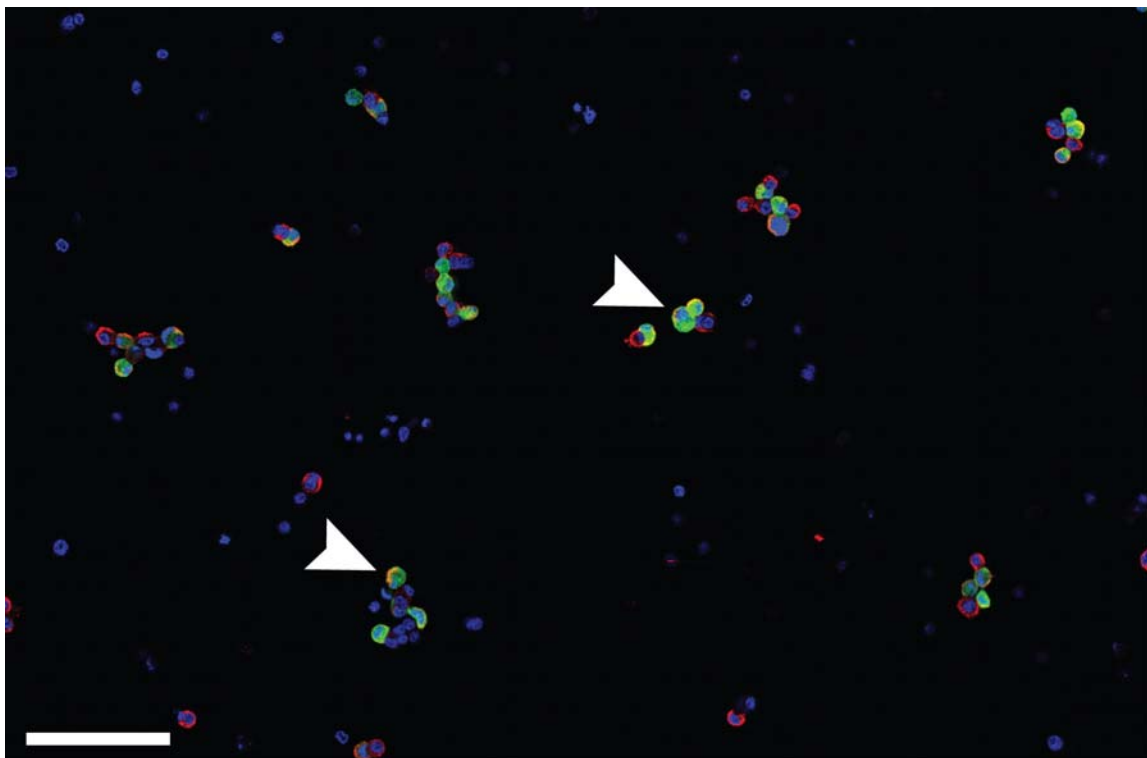

SUPPLEMENTARY DATA

**Supplementary Table 1. Demographic characteristics of human islet donors**

|                        | <b>Donor 1</b> | <b>Donor 2</b> | <b>Donor 3</b>                                                                        |
|------------------------|----------------|----------------|---------------------------------------------------------------------------------------|
| Age, years             | 55             | 55             | 29                                                                                    |
| Gender (M/F)           | M              | F              | M                                                                                     |
| Ethnicity              | n.r.           | White          | Hispanic/Latino                                                                       |
| Body weight, kg        | 85.0           | 109.1          | 87.3                                                                                  |
| BMI, kg/m <sup>2</sup> | 28.4           | 39.9           | 27.5                                                                                  |
| Time in culture*       | 16 h           | 28 h           | 20 h                                                                                  |
| HLA                    | n.r.           | n.r.           | Class 1 – A: 2, 11<br>Class 1 – B: 7, 51<br>Class 1 – C: 7, 15<br>Class 2 – DR: 8, 15 |

**Abbreviations:** BMI, body mass index; n.r., not recorded. \*Refers to the amount of time that the human islets were cultured following isolation until shipment to our laboratory.

SUPPLEMENTARY DATA

**Supplementary Table 2.** Normalized gene copy numbers in islet grafts for genes with significant increases or decreases in expression (CVB4-infected versus mock-infected) when data from three experiments were combined; mean values are shown for each experiment.

| Genes with increased expression        | Experiment 1       |                    |         |     | Experiment 2       |                    |         |    | Experiment 3       |                    |         |    |
|----------------------------------------|--------------------|--------------------|---------|-----|--------------------|--------------------|---------|----|--------------------|--------------------|---------|----|
|                                        | Mock Average (n=5) | CVB4 Average (n=6) | P value |     | Mock Average (n=5) | CVB4 Average (n=4) | P value |    | Mock Average (n=5) | CVB4 Average (n=4) | P value |    |
| CXCL10                                 | 7                  | 32                 | 0.035   | *   | 4                  | 23                 | 0.114   | ns | 6                  | 27                 | 0.020   | *  |
| MX1                                    | 55                 | 236                | 0.004   | **  | 71                 | 151                | 0.378   | ns | 54                 | 140                | 0.019   | *  |
| HLA-A                                  | 170                | 515                | 0.001   | **  | 229                | 447                | 0.060   | ns | 180                | 370                | 0.048   | *  |
| OAS2                                   | 5                  | 15                 | 0.020   | *   | 5                  | 17                 | 0.331   | ns | 8                  | 21                 | 0.006   | *  |
| TXNIP                                  | 271                | 493                | 0.022   | *   | 193                | 402                | 0.050   | *  | 204                | 585                | 0.057   | ns |
| CCL5                                   | 5                  | 9                  | 0.233   | ns  | 3                  | 9                  | 0.088   | ns | 4                  | 12                 | 0.299   | ns |
| IFIH1                                  | 13                 | 28                 | 0.004   | **  | 11                 | 18                 | 0.022   | *  | 7                  | 15                 | 0.009   | *  |
| CASP1                                  | 7                  | 15                 | 0.005   | *   | 3                  | 8                  | 0.008   | *  | 6                  | 9                  | 0.318   | ns |
| CCL3                                   | 1                  | 3                  | 0.090   | ns  | 1                  | 3                  | 0.273   | ns | 3                  | 6                  | 0.230   | ns |
| IL10                                   | 2                  | 2                  | 0.926   | ns  | 1                  | 5                  | 0.060   | ns | 2                  | 3                  | 0.170   | ns |
| TNFAIP3                                | 38                 | 41                 | 0.575   | ns  | 25                 | 47                 | 0.157   | ns | 29                 | 87                 | 0.128   | ns |
| DDX58                                  | 208                | 315                | 0.002   | **  | 148                | 239                | 0.198   | ns | 140                | 251                | 0.078   | ns |
| SIRPG                                  | 4                  | 5                  | 0.227   | ns  | 1                  | 6                  | 0.080   | ns | 4                  | 6                  | 0.650   | ns |
| DDIT3                                  | 326                | 437                | 0.039   | *   | 164                | 250                | 0.025   | *  | 141                | 211                | 0.008   | *  |
| IRF1                                   | 24                 | 36                 | 0.013   | *   | 17                 | 22                 | 0.344   | ns | 20                 | 30                 | 0.148   | ns |
| STAT1                                  | 39                 | 81                 | 0.012   | *   | 41                 | 47                 | 0.804   | ns | 36                 | 46                 | 0.337   | ns |
| CCDC88A                                | 17                 | 20                 | 0.300   | ns  | 12                 | 30                 | 0.050   | *  | 18                 | 21                 | 0.711   | ns |
| NMI                                    | 6                  | 7                  | 0.227   | ns  | 3                  | 3                  | 0.694   | ns | 3                  | 6                  | 0.141   | ns |
| EIFAK3                                 | 120                | 162                | 0.001   | **  | 83                 | 96                 | 0.457   | ns | 85                 | 123                | 0.013   | *  |
| GSK3B                                  | 280                | 313                | 0.101   | ns  | 254                | 320                | 0.164   | ns | 212                | 263                | 0.049   | *  |
| <b>Genes with decreased expression</b> |                    |                    |         |     |                    |                    |         |    |                    |                    |         |    |
| INS                                    | 38456              | 15143              | 0.004   | **  | 17383              | 5410               | 0.011   | *  | 11617              | 3977               | 0.003   | ** |
| PDX1                                   | 122                | 62                 | 0.022   | **  | 92                 | 26                 | 0.023   | *  | 55                 | 20                 | 0.009   | *  |
| SST                                    | 5848               | 3060               | 0.047   | *   | 5144               | 1201               | 0.005   | *  | 1925               | 920                | 0.007   | *  |
| IL1B                                   | 35                 | 18                 | 0.012   | *   | 17                 | 13                 | 0.362   | ns | 17                 | 6                  | 0.064   | ns |
| WFS1                                   | 56                 | 42                 | 0.047   | *   | 57                 | 15                 | 0.008   | *  | 33                 | 18                 | 0.002   | ** |
| XBP1                                   | 129                | 93                 | 0.176   | ns  | 99                 | 36                 | 0.043   | *  | 48                 | 29                 | 0.041   | *  |
| SREBF1                                 | 101                | 85                 | 0.353   | ns  | 123                | 44                 | 0.028   | *  | 59                 | 39                 | 0.054   | ns |
| CTLA4                                  | 34                 | 16                 | 0.0005  | *** | 16                 | 14                 | 0.679   | ns | 15                 | 11                 | 0.294   | ns |

\*, P <0.05; \*\*, P <0.01; \*\*\*, P <0.001; ns, not significant, Student's t-test

SUPPLEMENTARY DATA

**Supplementary Table 3.** Mean normalized gene copy numbers in *ex vivo* cultured islets for genes with >2.5 fold increases or decreases in expression (CVB4-infected versus mock-infected).

| Genes with increased expression        | Mock Average (n=3) | CVB4 Average (n=3) | P value |    |
|----------------------------------------|--------------------|--------------------|---------|----|
|                                        |                    |                    |         |    |
| CXCL10                                 | 5                  | 217                | 0.080   | ns |
| OAS2                                   | 3                  | 71                 | 0.007   | *  |
| CCL3                                   | 2                  | 35                 | 0.040   | *  |
| IFNG                                   | 3                  | 39                 | 0.005   | *  |
| CREB3L3                                | 3                  | 39                 | 0.117   | ns |
| MX1                                    | 54                 | 641                | 0.004   | *  |
| CCL4                                   | 6                  | 46                 | 0.121   | ns |
| CCL5                                   | 6                  | 41                 | 0.048   | *  |
| IFNB1                                  | 8                  | 63                 | 0.019   | *  |
| HNF1A                                  | 5                  | 33                 | 0.047   | *  |
| TLR3                                   | 6                  | 28                 | 0.009   | *  |
| EIF2AK3                                | 14                 | 56                 | 0.062   | ns |
| HMOX1                                  | 29                 | 136                | 0.031   | *  |
| GK                                     | 16                 | 67                 | 0.002   | *  |
| IL8                                    | 1159               | 4784               | 0.044   | *  |
| NMI                                    | 8                  | 31                 | 0.039   | *  |
| KCNQ1                                  | 16                 | 60                 | 0.119   | ns |
| PDE4B                                  | 6                  | 22                 | 0.073   | ns |
| PTPN22                                 | 2                  | 6                  | 0.153   | ns |
| SKAP2                                  | 14                 | 40                 | 0.004   | *  |
| IFIH1                                  | 10                 | 32                 | 0.141   | ns |
| STAT1                                  | 29                 | 91                 | 0.136   | ns |
| CASP8                                  | 10                 | 29                 | 0.004   | *  |
| CCDC88A                                | 8                  | 28                 | 0.325   | ns |
| TCF7L2                                 | 30                 | 83                 | 0.102   | ns |
| <b>Genes with decreased expression</b> |                    |                    |         |    |
| INS                                    | 17388              | 2764               | 0.034   | *  |
| SST                                    | 7331               | 1192               | 0.071   | ns |
| PDX1                                   | 152                | 34                 | 0.056   | ns |
| CTSH                                   | 175                | 54                 | 0.030   | *  |
| CTRB2                                  | 527                | 200                | 0.066   | ns |
| CTLA4                                  | 20                 | 7                  | 0.117   | ns |

\*, P <0.05; ns, not significant, Student's t-test

A Supplementary Spreadsheet is also available. This includes sequences for the NanoString human gene CodeSet, normalized gene expression values from grafts from *in vivo* and *ex vivo* experiments, and body weights and glucose values for all mice.
